# Supplementary material for: Effect of Dietary Plant Feedstuffs and Protein/Carbohydrate Ratio on Gilthead Seabream (Sparus aurata) Gut Health and Functionality
Source: MDPI journal article supplement (doi:10.3390/fishes7020059), 2022-03-07
Supplement: s1 [file s1]

**Table S1.** Details of diets, ingredient composition, and proximate analysis published in Basto-Silva, *et al.* [28].

|                                          | Diets       |             |             |             |
|------------------------------------------|-------------|-------------|-------------|-------------|
|                                          | FM-P50/CH10 | FM-P40/CH20 | PF-P50/CH10 | PF-P40/CH20 |
| <i>Ingredients (%DM)</i>                 |             |             |             |             |
| Fishmeal <sup>1</sup>                    | 64.8        | 51.9        | 13.0        | 10.4        |
| Soybean meal <sup>2</sup>                | -           | -           | 25.0        | 19.1        |
| Wheat gluten <sup>3</sup>                | -           | -           | 12.7        | 9.0         |
| Corn gluten <sup>4</sup>                 | -           | -           | 22.6        | 20.0        |
| Fish oil <sup>5</sup>                    | 10.4        | 11.9        | 15.2        | 15.7        |
| Pregelatinized maize starch <sup>6</sup> | 10.0        | 20.0        | 5.9         | 16.6        |
| Cellulose <sup>7</sup>                   | 11.3        | 12.7        | -           | 2.9         |
| Monocalcium phosphate <sup>8</sup>       | -           | -           | 1.5         | 2.1         |
| Lysine <sup>9</sup>                      | -           | -           | 0.6         | 0.5         |
| Taurine <sup>10</sup>                    | -           | -           | 0.2         | 0.2         |
| Vitamin mix <sup>11</sup>                | 1.0         | 1.0         | 1.0         | 1.0         |
| Mineral mix <sup>12</sup>                | 1.0         | 1.0         | 1.0         | 1.0         |
| Binder <sup>13</sup>                     | 1.0         | 1.0         | 1.0         | 1.0         |
| Choline chloride (50%)                   | 0.5         | 0.5         | 0.5         | 0.5         |
| <i>Proximate analysis (%DM)</i>          |             |             |             |             |
| Dry matter                               | 92.1        | 92.9        | 93.8        | 90.3        |
| Crude protein                            | 51.3        | 39.1        | 50.6        | 38.0        |
| Crude fat                                | 18.7        | 18.6        | 18.7        | 18.4        |
| Ash                                      | 8.6         | 7.5         | 6.4         | 5.6         |
| Starch                                   | 9.0         | 17.2        | 11.4        | 18.2        |
| Gross energy (kJ g <sup>-1</sup> )       | 23.7        | 21.2        | 22.1        | 20.6        |

CH: Carbohydrate; CP: Crude protein; DM: Dry matter; FM: Fishmeal; GL: Gross lipid; P: Protein; PF: Plant-feedstuffs.

<sup>1</sup>Sorgal. S.A. Ovar. Portugal (CP: 77.1% DM; GL: 11.8% DM).

<sup>2</sup>Sorgal. S.A. Ovar. Portugal (CP: 52.0% DM; GL: 1.9% DM).

<sup>3</sup>Sorgal. S.A. Ovar. Portugal (CP: 83.1% DM; GL: 1.4% DM).

<sup>4</sup>Sorgal. S.A. Ovar. Portugal (CP: 70.1% DM; GL: 2.8% DM).

<sup>5</sup>Sorgal. S.A. Ovar. Portugal.

<sup>6</sup>C-Gel instant 12018. Cerestar. Mechelen. Belgium.

<sup>7</sup> $\alpha$ - Cellulose (C-8002). Sigma-Aldrich. Sintra. Portugal.

<sup>8</sup>Sorgal. S.A. Ovar. Portugal.

<sup>9</sup>Feed-grade lysine. Sorgal. S.A. Ovar. Portugal.

<sup>10</sup>Feed-grade taurine. Sorgal. S.A. Ovar. Portugal.

<sup>11</sup>Vitamins (mg kg<sup>-1</sup> diet): retinol acetate. 18000 (IU kg<sup>-1</sup> diet); cholecalciferol. 2000 (IU kg<sup>-1</sup> diet); alpha tocopherol acetate. 35; sodium menadione bisulphate. 10; thiamin-HCl. 15; riboflavin. 25; calcium pantothenate. 50; nicotinic acid. 200; pyridoxine HCl. 5; folic acid 10; cyanocobalamin. 0.02; biotin. 1.5; ascorbic acid. 50; inositol. 400. Premix. Lda. Viana do Castelo. Portugal.

<sup>12</sup>Minerals (mg kg<sup>-1</sup> diet): copper (II) sulphate. 5; ferrous carbonate. 40; fluorine. 1; potassium iodide. 0.6; magnesium oxide. 500; manganese oxide. 20; sodium selenite. 0.3; zinc oxide. 30; Minerals content (%): Calcium. 17; Phosphorus. 13; Potassium. 6; Chloride. 7; Sodium chloride. 4. Premix. Lda. Viana do Castelo. Portugal.

<sup>13</sup>Liptosa. Madrid. Spain.
